# Supplementary material for: Association of COVID-19-Associated Pulmonary Aspergillosis with Cytomegalovirus Replication: A Case–Control Study
Source: MDPI journal article supplement (doi:10.3390/jof8020161), 2022-02-06
Supplement: s1 [file s1]

| Patient | Classification | Serum GM | BAL GM   | <i>Aspergillus</i> specie | Isolation sample  | Antifungigram |          |          |           |        |
|---------|----------------|----------|----------|---------------------------|-------------------|---------------|----------|----------|-----------|--------|
|         |                |          |          |                           |                   | Vor. MIC      | Isa. MIC | Pos. MIC | Ech*. MIC | Amph.B |
| 1       | Probable       | Positive | N/A      | <i>A. fumigatus</i>       | BAL               | S             | S        | S        | S         | S      |
| 2       | Probable       | Negative | N/A      | <i>A. niger</i>           | BAL               | S             | S        | S        | S         | S      |
| 3       | Probable       | Positive | N/A      | <i>A. flavus</i>          | BAL               | S             | S        | S        | S         | S      |
| 4       | Probable       | Positive | Positive | <i>A. fumigatus</i>       | BAL               | S             | S        | S        | S         | S      |
| 5       | Probable       | Negative | N/A      | <i>A. fumigatus</i>       | BAL               | S             | S        | S        | S         | S      |
| 6       | Probable       | Positive | N/A      | <i>A. fumigatus</i>       | BAL               | S             | S        | S        | S         | S      |
| 7       | Probable       | Positive | N/A      | <i>A. niger</i>           | BAS               | S             | S        | S        | S         | S      |
| 8       | Probable       | Negative | Positive | No culture growth         |                   | N/A           | N/A      | N/A      | N/A       | N/A    |
| 9       | Probable       | Negative | Positive | No culture growth         |                   | N/A           | N/A      | N/A      | N/A       | N/A    |
| 10      | Probable       | Negative | N/A      | <i>A. fumigatus</i>       | BAL               | S             | S        | S        | S         | S      |
| 11      | Probable       | Negative | Positive | <i>A. niger</i>           | BAL               | S             | S        | S        | S         | S      |
| 12      | Probable       | Negative | N/A      | <i>A. fumigatus</i>       | BAL               | S             | S        | S        | S         | S      |
| 13      | Probable       | N/A      | N/A      | <i>A. fumigatus</i>       | BAL               | S             | S        | S        | S         | S      |
| 14      | Probable       | Negative | Negative | <i>A. fumigatus</i>       | BAL               | S             | S        | S        | S         | S      |
| 15      | Possible       | Negative | N/A      | <i>A. fumigatus</i>       | Tracheal aspirate | S             | S        | S        | S         | S      |
| 16      | Possible       | Negative | N/A      | <i>A. terreus</i>         | Tracheal aspirate | S             | S        | S        | S         | R      |
| 17      | Possible       | Negative | N/A      | No culture growth         |                   | N/A           | N/A      | N/A      | N/A       | N/A    |
| 18      | Possible       | Negative | N/A      | <i>A. fumigatus</i>       | BAS               | S             | S        | S        | S         | S      |
| 19      | Possible       | Negative | N/A      | <i>A. fumigatus</i>       | Tracheal aspirate | S             | S        | S        | S         | S      |
| 20      | Possible       | Negative | N/A      | <i>A. fumigatus</i>       | BAS               | S             | N/A      | S        | S         | S      |
| 21      | Possible       | Negative | N/A      | <i>A. fumigatus</i>       | Sputum            | S             | S        | S        | S         | S      |
| 22      | Possible       | Negative | N/A      | <i>A. fumigatus</i>       | BAS               | S             | S        | S        | S         | S      |
| 23      | Possible       | Negative | N/A      | <i>A. fumigatus</i>       | BAS               | S             | S        | S        | S         | S      |
| 24      | Possible       | Negative | Negative | <i>A. fumigatus</i>       | BAS               | N/A           | N/A      | N/A      | N/A       | N/A    |

\*Anidulafungin MIC was taken as the reference echinocandin test. If anidulafungin sensitivity was not available, caspofungin MIC was chosen.

**Table S1.** Patient-level data on microbiological data and available antifungigram of CAPA cases. For MIC interpretation, EUCAST 2020 criteria were used. CAPA: COVID-associated pulmonary aspergillosis; GM: galactomannan; BAL: bronchoalveolar lavage; BAS: broncoaspirate; Vor: voriconazole; Pos: posaconazole; Ech: echinocandin; AmphB: amphotericin B; MIC: minimum inhibitory concentration; N/A: not available.
